# Supplementary material for: Lost in the bloom: DNA-PKcs in green plants
Source: Frontiers journal article supplement (doi:10.3389/fpls.2023.1231678), 2023-07-28
Supplement: Data_Sheet_1.zip [file Data_Sheet_1.zip]

| Organism                          | Gene/protein annotation discussed or used in this study |                                                                                                                 | Annotation/prediction supported by transcriptome data of the organism or a closely related species (based on TSA available publicly) |                                        |
|-----------------------------------|---------------------------------------------------------|-----------------------------------------------------------------------------------------------------------------|--------------------------------------------------------------------------------------------------------------------------------------|----------------------------------------|
|                                   | Existing gene annotation/prediction: YES/NO (Details)   | Existing gene annotation/prediction either modified /New annotation/prediction for this study: YES/NO (Details) | Partially supported: YES/NO (Details)                                                                                                | Completely supported: YES/NO (Details) |
| <i>Chlamydomonas eustigma</i>     | NO (GAX74142, GAX74143) NCBI                            | NO                                                                                                              | YES (GFWA01012995.1; GFWA01107356.1) ( <i>Chlamydomonas acidophila</i> , NCBI)                                                       | No                                     |
| <i>Volvox carteri</i>             | NO (Vocar.0009s0222) Phytozome                          | NO                                                                                                              | NO                                                                                                                                   | NO                                     |
| <i>Bathycoccus prasinus</i>       | YES (XP_007511896.1), NCBI                              | NO                                                                                                              | YES (HBMR01008367; HBMR01008373; HBMR01008370), NCBI                                                                                 | NO                                     |
| <i>Ostreococcus tauri</i>         | YES (OUS42981.1), NCBI                                  | NO                                                                                                              | YES (HBDX01000727; HBLQ01004044), NCBI                                                                                               | NO                                     |
| <i>Mesotaenium endlicherianum</i> | NO (ME000610S08690)                                     | YES, (Described in methods)                                                                                     | NO                                                                                                                                   | NO                                     |
| <i>Chara braunii</i>              | NO (GBG89877.1)                                         | NO                                                                                                              | YES (GGXX01117481.1), NCBI                                                                                                           | NO                                     |

|                              |                                                                                                                                                              |                               |                                                    |                                                                                                      |
|------------------------------|--------------------------------------------------------------------------------------------------------------------------------------------------------------|-------------------------------|----------------------------------------------------|------------------------------------------------------------------------------------------------------|
|                              |                                                                                                                                                              |                               |                                                    |                                                                                                      |
| <i>Klebsormidium nitens</i>  | NO (GAQ84758.1 , GAQ84757.1)<br>Source: NCBI                                                                                                                 | YES<br>(Described in methods) | YES<br>(GBSO01008411.1)<br>(GBSO01005714.1 ), NCBI | NO                                                                                                   |
| <i>Marchantia polymorpha</i> | YES<br>(Mapoly0069s0061.1)<br>Source: Phytozome                                                                                                              | NO                            | YES<br>(GEFO01007190.1,<br>GEFO01010847.1)         | NO                                                                                                   |
| <i>Physcomitrella patens</i> | YES<br>(XP_024384633.1)<br>Source: NCBI                                                                                                                      | NO                            | NO                                                 | YES (as per entry XM_024528865, 100% coverage of the annotated genomic feature by RNAseq alignments) |
| <i>Sphagnum fallax</i>       | YES<br><br>(Sphfalx06G105000.1 )<br><br>Source: "Sphagnum fallax v1.1, DOE-JGI, <a href="http://phytozome.jgi.doe.gov/">http://phytozome.jgi.doe.gov/</a> ". | NO                            | NO                                                 | NO                                                                                                   |

|                                     |                                                                                                                                                                                                     |                                                             |                                                                                       |                                                                                                                                |
|-------------------------------------|-----------------------------------------------------------------------------------------------------------------------------------------------------------------------------------------------------|-------------------------------------------------------------|---------------------------------------------------------------------------------------|--------------------------------------------------------------------------------------------------------------------------------|
| <i>Anthoceros agrestis</i> [Oxford] | NO<br>(AagrOXF_evm.mode<br>l.utg000049l.749.1)<br>Source:<br><a href="https://www.hornwort&lt;br/&gt;s.uzh.ch">https://www.hornwort<br/>s.uzh.ch</a>                                                | YES (Described in<br>methods)<br>(scaffold_2012162,<br>1KP) | NO                                                                                    | YES<br>(scaffold_2012162), 1KP                                                                                                 |
| <i>Diphasiastrum complanatum</i>    | YES<br>(Dicom.17G090200.1)<br><br>Source:<br>"Diphasiastrum<br>complanatum v3.1,<br>DOE-JGI,<br><a href="http://phytozome-&lt;br/&gt;next.jgi.doe.gov/">http://phytozome-<br/>next.jgi.doe.gov/</a> | NO                                                          | NO                                                                                    | NO                                                                                                                             |
| <i>Selaginella moellendorffii</i>   | YES<br>(XP_002965996.2)<br><br>XP_002989230.2                                                                                                                                                       | NO                                                          | NO                                                                                    | YES<br>(NCBI entry:100%<br>coverage of<br>the annotated genomic<br>feature by RNAseq<br>alignments"<br>And<br>(GEMU01096076.1) |
| <i>Azolla filiculoides</i>          | NO<br>(Azfi_s0095.g043658)<br><br>Source: Fernbase.org                                                                                                                                              | YES<br><br>(Described in<br>methods)                        | YES (partial TSA, at NCBI)<br>GBTV01032116.1<br>GBTV01032115.1<br>and at fernbase.org |                                                                                                                                |
| <i>salvinia cucullata</i>           | NO<br>(Sacu_v1.1_s0105.g0<br>20212)<br>Source: Fernbase.org                                                                                                                                         | NO                                                          | YES (at fernbase.org)                                                                 | NO                                                                                                                             |

|                               |                                                                                                                                                                                                                                                                            |                                                 |                                                 |                                                                                                    |
|-------------------------------|----------------------------------------------------------------------------------------------------------------------------------------------------------------------------------------------------------------------------------------------------------------------------|-------------------------------------------------|-------------------------------------------------|----------------------------------------------------------------------------------------------------|
| <i>Ceratopteris richardii</i> | NO (Ceric.1Z120700)<br>Source: Phytozome                                                                                                                                                                                                                                   | YES (based on TSA)                              | No                                              | YES<br>(GIXU01015881)                                                                              |
| <i>Pinus taeda</i>            | NO                                                                                                                                                                                                                                                                         | YES (Predicted from TSA, Described in methods)  | Yes<br><i>Pinus taeda</i> TSA<br>(GIYS01087684) | YES<br>(GHWB01310569)( <i>Pinus flexilis</i> TSA)                                                  |
| <i>Sequoia sempervirens</i>   | NO                                                                                                                                                                                                                                                                         | YES<br><br>Predicted from TSA<br>(GIBU01226047) | No                                              | YES (GIBU01226047)                                                                                 |
| <i>Isoetes taiwanensis</i>    | NO<br>>Isoetes taiwanensis  Itaiw_v1_scaffold_24  14899984  14905902  Itaiw_v1_scaffold_24_t17467-RA  1  CDS  3473898239  3044  frame0<br>>Isoetes taiwanensis  Itaiw_v1_scaffold_24  14910580  14923530  Itaiw_v1_scaffold_24_t17468-RA  1  CDS  3473898242  4268  frame0 | NO                                              | NO                                              | Annotated as two separate proteins.NO sufficient RNA support to determine the full length protein. |

**Supplementary Table 1.** Details of putative DNA-PKcs gene/protein annotations used or discussed in the current study from different plant species.
